# In Vivo Analysis of *Aicda* Gene Regulation: A Critical Balance between Upstream Enhancers and Intronic Silencers Governs Appropriate Expression

Le Thi Huong<sup>1‡</sup>, Maki Kobayashi<sup>1</sup>, Mikiyo Nakata<sup>1</sup>, Go Shioi<sup>3</sup>, Hitoshi Miyachi<sup>4</sup>, Tasuku Honjo<sup>1</sup>, Hitoshi Nagaoka<sup>2\*</sup>

**1** Department of Immunology and Genomic Medicine, Graduate School of Medicine, Kyoto University, Kyoto, Japan, **2** Department of Molecular Pathobiochemistry, Gifu University Graduate School of Medicine, Gifu, Japan, **3** Laboratory for Animal Resources and Genetic Engineering, RIKEN Center for Developmental Biology, Kobe, Japan, **4** Reproductive Engineering Team, Institute of Virus Research, Kyoto University, Kyoto, Japan

## Abstract

The *Aicda* gene encodes activation-induced cytidine deaminase (AID). *Aicda* is strongly transcribed in activated B cells to diversify immunoglobulin genes, but expressed at low levels in various other cells in response to physiological or pathological stimuli. AID's mutagenic nature has been shown to be involved in tumor development. Here, we used a transgenic strategy with bacterial artificial chromosomes (BACs) to examine the *in vivo* functions of *Aicda* regulatory elements, which cluster in two regions: in the first intron (region 2), and approximately 8-kb upstream of the transcription start site (region 4). Deleting either of these regions completely abolished the expression of *Aicda*-BAC reporters, demonstrating these elements' critical roles. Furthermore, we found that selectively deleting two C/EBP-binding sites in region 4 inactivated the enhancer activity of the region despite the presence of intact NF- $\kappa$ B-, STAT6- and Smad-binding sites. On the other hand, selectively deleting E2F- and c-Myb-binding sites in region 2 increased the frequency of germinal-center B cells in which the *Aicda* promoter was active, indicating that E2F and c-Myb act as silencers *in vivo*. Interestingly, the silencer deletion did not cause ectopic activation of the *Aicda* promoter, indicating that *Aicda* activation requires enhancer-specific stimulation. In summary, precise regulation of the *Aicda* promoter appears to depend on a coordinated balance of activities between enhancer and silencer elements.

**Citation:** Huong LT, Kobayashi M, Nakata M, Shioi G, Miyachi H, et al. (2013) *In Vivo* Analysis of *Aicda* Gene Regulation: A Critical Balance between Upstream Enhancers and Intronic Silencers Governs Appropriate Expression. PLoS ONE 8(4): e61433. doi:10.1371/journal.pone.0061433

**Editor:** Kefei Yu, Michigan State University, United States of America

**Received:** February 22, 2013; **Accepted:** March 8, 2013; **Published:** April 16, 2013

**Copyright:** © 2013 Huong et al. This is an open-access article distributed under the terms of the Creative Commons Attribution License, which permits unrestricted use, distribution, and reproduction in any medium, provided the original author and source are credited.

**Funding:** Supported by the Ministry of Education, Culture, Sports, Science and Technology of Japan, KAKENHI Grant-in-AID for Special Promoted Research 17002015 (TH), Grant-in-AID for Scientific Research 11016207 (HN), and Takeda Science Foundation (HN) (<http://www.takeda-sci.or.jp>). The funders had no role in study design, data collection and analysis, decision to publish, or preparation of the manuscript.

**Competing Interests:** The authors have declared that no competing interests exist.

\* E-mail: nagaokh@gifu-u.ac.jp

‡ Current address: Department of Clinical Pharmacy, Thai Nguyen University of Medicine and Pharmacy, Thai Nguyen, Viet Nam

## Introduction

Activation-induced cytidine deaminase (AID), which is encoded by *Aicda*, is central to antigen-induced immunoglobulin (Ig) diversification, that is, somatic hypermutation (SHM) and class-switch recombination (CSR) in activated B cells [1,2]. AID triggers the induction of nicking cleavage at the *Ig* loci [3,4]. Although the target specificity of AID is limited to *Ig* genes, in which SHM and CSR take place, AID can target many other genes, including proto-oncogenes, although with much lower frequencies [5–9]. It has been suggested that this type of non-physiological, off-target attack by AID is involved in tumorigenesis of not only B cells, but also other cell lineages [10]. Supporting this idea, artificially overexpressing AID in transgenic mice causes tumors in non-B cells such as T lymphoma, lung tumor, and hepatoma [11,12]. Moreover, *Aicda* knockout drastically delays tumor development in animal models of plasmacytoma, which is associated with suppressed *Ig-Myc* translocation [13,14]. AID is thus suspected to be an endogenous mutagenic enzyme.

Given this self-mutating activity of AID, one would expect *Aicda* to be regulated very strictly to avoid any leaky expression. Indeed, several reports have shown that strong AID expression is virtually restricted to germinal-center B cells *in vivo* [15–17]. However, there is growing evidence that cells other than activated B cells can express AID when exposed to strong stimulation. In particular, AID expression is induced in gastric epithelial cells by *Helicobacter pylori* infection, providing insight into the mechanisms of pathogen-associated tumorigenesis—namely, that AID may act as a mutagen in inflammation-associated tumor development [18]. Other tumorigenic pathogens, including the EB, hepatitis C, and HTLV-1 viruses, are reported to induce or enhance AID expression [19–22]. The NF- $\kappa$ B pathway appears to be involved in AID's induction in *H. pylori*-infected gastric epithelial cells, suggesting that the inflammatory signals associated with infection by this pathogen may be involved in inducing AID [18].

Under physiological conditions, AID is also expressed in immature B cells and in some activated T cells at a level one to two orders of magnitude lower than that in germinal-center B cells; the role of such low amounts of AID is unclear [16,17,23,24].

*Aicda* is transiently expressed in a fraction of activated T cells, including a subset of T cells that produces IL-10, suggesting that *Aicda*-inductive stimuli correlate with the development of this T-cell subset [17]. In the case of immature B cells, AID may assist in removing B cells carrying self-reactive Igs on their surface [25,26]. These findings suggest that marginal levels of AID might have physiological roles other than Ig diversification, although the precise nature of those roles is largely unclear. Taken together, AID expression differs according to cell lineages and conditions, and these differences might account for the variety of physiological and pathological cellular responses elicited by this molecule.

Genome sequencing revealed four regions in and around *Aicda* that are well-conserved between humans and mice (regions 1, 2, 3, and 4) [16,27,28]. The downstream region (region 3) was shown to be important using *Aicda* bacterial-artificial-chromosome (BAC) constructs, although *in vitro* reporter assays have not clarified its regulatory function [16,28]. Several *Aicda*-regulation studies have shown that the *Aicda* promoter (region 1) is not particularly specific to B cells, and promotes transcription in various types of cells [27,28]. A HoxC4-binding site located in the promoter region is reported to induce *Aicda* transcription by increased HoxC4 levels [29,30]. *Aicda* also contains major regulatory elements in regions 2 and 4 [27,28]. Region 2, which is located in the first intron, contains binding sites for B-cell-specific transcription factors such as Pax5 and E [27,28,31], as well as E2F- and c-Myb-binding sites, which exert a strong silencing effect on the promoter [28]. Region 4, located about 8-kb upstream of the transcription-initiation site, contains stimulation-responsive elements for STAT6, NF- $\kappa$ B, Smad, and C/EBP. A previous *in vitro* reporter assay of mutations in these elements led us to propose a balanced regulation model of the *Aicda* promoter, in which B-cell-specific and stimulation-responsive enhancers coordinate to counteract the silencers, de-repressing the *Aicda* promoter [28].

To understand the physiological mechanisms regulating *Aicda*, here we used BAC DNA to generate several lines of transgenic mice, and used these mice to verify the *in vivo* activity of *Aicda* regulatory elements identified by the previous *in vitro* reporter assay [28]. The present study clearly demonstrates that *Aicda* is regulated *in vivo* by the balance between the positive and negative transcription factors that were identified in our *in vitro* experiments.

## Materials and Methods

### Ethics Statement

Animal housing and experiments were performed according to the Animal Experiment Guidelines Riken Center for Developmental Biology and the Regulation on Animal Experimentation at Kyoto University. All protocols involving mice were approved by the Kobe Animal Experiments Committee at RIKEN and the Animal Research Committee of the Graduate School of Medicine, Kyoto University (Permit Number: AH13-03-59 and 10055). Mice were euthanized according to the Animal Experiment Guidelines Riken Center for Developmental Biology and the Regulation on Animal Experimentation at Kyoto University before removing lymphoid organs.

### Generation of Transgenic Mice

To generate BAC transgenic mice, we obtained the BAC clone RP24-6817, which is 190 kb in length and harbors the entire *Aicda* gene, from BACPAC CHORI (<http://bacpac.chori.org/>) [32]. To generate the Aid-cre-cd2 construct, an expression cassette of cre IRES hCD2, the intracellular domain of which was deleted, was inserted into exon 2 of mouse *Aicda* on the BAC by homologous

recombination in bacteria, as described previously [32] (Fig. 1A). We derived transgenic constructs with a series of deletions (Fig. 1A) from the Aid-cre-cd2 construct. The Red/ET recombination kit (Gene Bridges, Germany) was used according to the manufacturer's instructions for all the BAC modifications. In brief, we constructed vectors carrying two homology arms (either an 80-bp synthesized oligonucleotide or a PCR product of approximately 0.5 kb) adjacent to the DNA region we wished to delete or replace. The homology arms were ligated with donor DNA containing PGK-Neo cassettes floxed by Frt sequences. DNA fragments for targeting were prepared by PCR and transfected into BAC-bearing *E. coli* with the pRedET plasmid. Recombinants were selected with kanamycin, and the PGK-Neo cassette was removed by transfecting the FLPe plasmid. When introducing secondary modifications to the Aid-cre-cd2 BAC construct, the Frt orientation was reversed in the second targeting construct to avoid accidentally deleting regions between the initial Frt site and the newly introduced Frts. Clones with the reversion were excluded after transfection with the FLPe plasmid.

The following primers were used to amplify the homology arms:

For the dR2-ac-cre transgene,  
 5'arm-dR2-Fwd: 5'-ATATGCAGTCATGATGAGCCA-3',  
 5'arm-dR2-Rv: 5'-AGGGGTGAGGGAGAGTGGGAGG-3',  
 3'arm-dR2-Fwd: 5'-GTGCTGGATGGAGGTGCCAGT-3',  
 and 3'arm-dR2-Rv: 5'-GTTATAATAATAAGCACAGGTA-3'.  
 For the dCEBP-ac-cre transgene, 5'arm-dCEBP-Fwd: 5'-GAGCGTAGAGGTCAGTGGACAA-3', 5'arm-dCEBP-Rv: 5'-CAACTTCTGCATTCCCGATTTT-3', 3'arm-dCEBP-Fwd: 5'-AGCTGGTGTCCAAAATAGTGA-3', and 3'arm-dCEBP-Rv: 5'-CTCTTACAGATGCCGTACACAT-3'.  
 For the dR4-ac-cre transgene, 5' homology arm (80 bp): 5'-TCAC-CACACTCAGTTTGAAGCCTTTTAAATTTTCATAGTATTC-CATTTGAAAATTCTTTTTCTCACTATAGGGCTCGAGG-AA-3', and 3' homology arm (80 bp): 5'-CCACACCCTCTCT-TACAGATGCCGTACACATGCCATAGGAACAAATACAA-AACCCTTGAGAATTTCGATATACGAAGTTAT-3'.

The dME-ac-cre transgene was generated in two steps. First, we amplified the fragment containing the c-Myb-binding motifs using the primers 5'arm-ME-Fwd: 5'-CTTTTCTTCTCCTCCTT-CTCC-3' and 5'arm-ME-Rv: CCTCTCCTCGGGATGTCCC-TCC. We then cloned the amplified fragment into the pGEM-T easy vector (Promega). The whole plasmid was PCR-amplified with the primers myb-mut-F 5'-NNGGATCCACATCCT-GAGCCCTCAAAAAGCA-3' and myb-mut-R 5'-NNGGAT-CCTTGTCTAGCATGTGTGAGGTCTTC-3'. The PCR product was digested by *Bam*HI and self-ligated. The other homology arm, the adjacent region of the E2F site, was amplified with the primers 3'arm-ME-Fwd: 5'-GCTCCTAGCTAGAGTTGAG-GGG-3' and 3'arm-ME-Rv: 5'-TCTAATCCAGCCAGTTT-TAAAC-3'. Two homology arms were ligated with both ends of the PGK-Neo cassette, and were used for homologous recombination in *E. coli* harboring Aid-cre-cd2. The nucleotide sequences of the modified area in the final constructs were checked by sub-cloning and sequencing.

Transgenic mice were generated by injecting supercoiled BAC DNA into CD-1 or C57BL/6 fertilized eggs; this was performed by the Laboratory for Animal Resources and Genetic Engineering, RIKEN Center for Developmental Biology (CDB) (Aid-cre-cd2, Acc. No. CDB0481T; dCEBP-ac-cre, Acc. No. CDB0482T; dR4-ac-cre, Acc. No. CDB0483T; dR2-ac-cre, Acc. No. CDB0484T: <http://www.cdb.riken.jp/arg/TG%20mutant%20mice%20list.html>) and the Reproductive Engineering Team at the Institute of Virus Research at Kyoto University. We used founder mice that had been backcrossed to C57BL/6 mice for more than five generations.

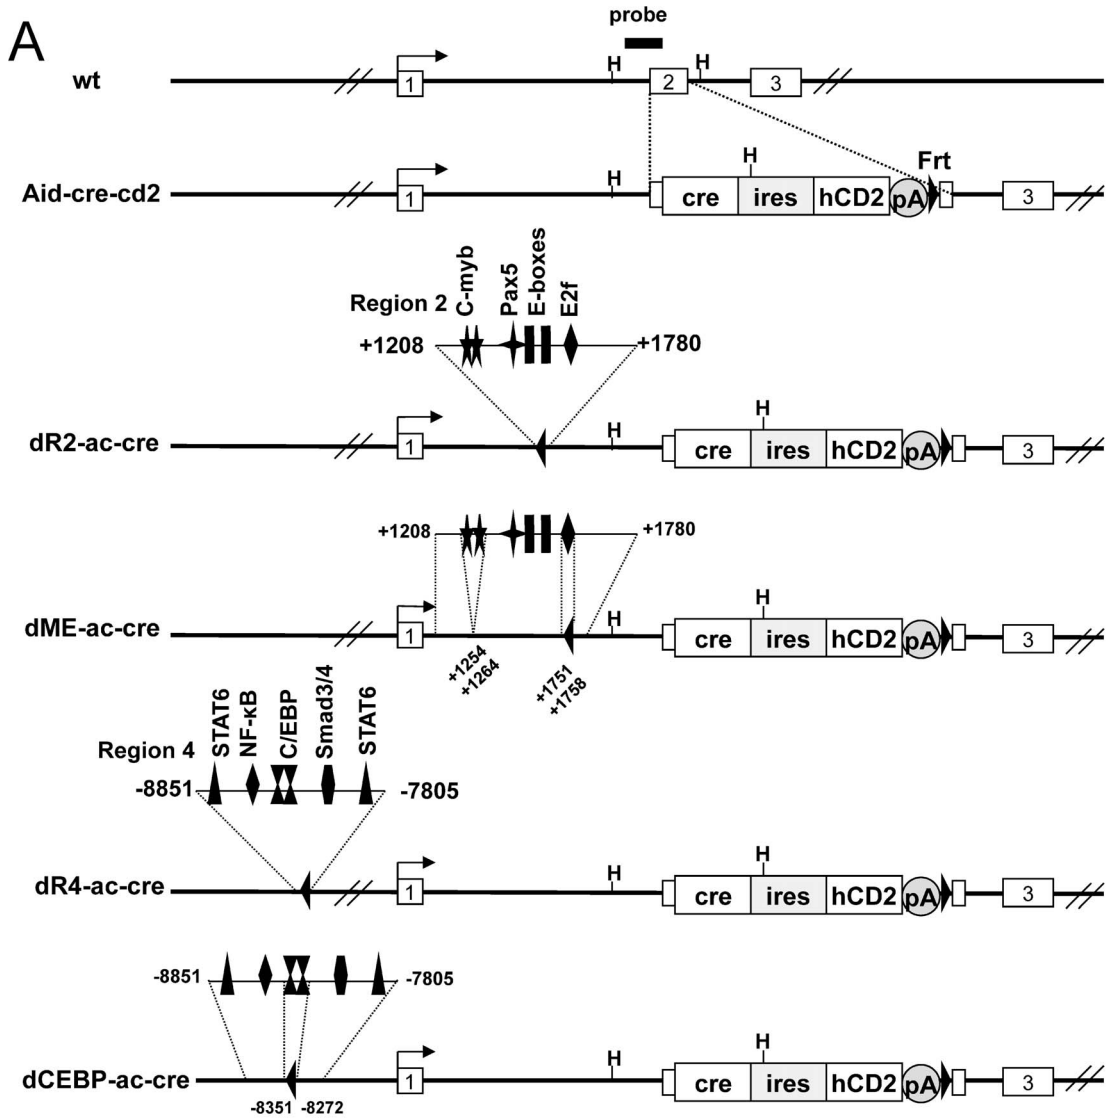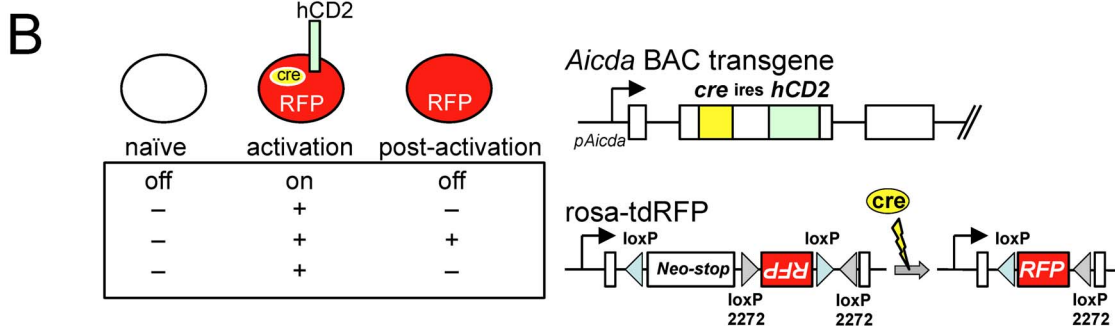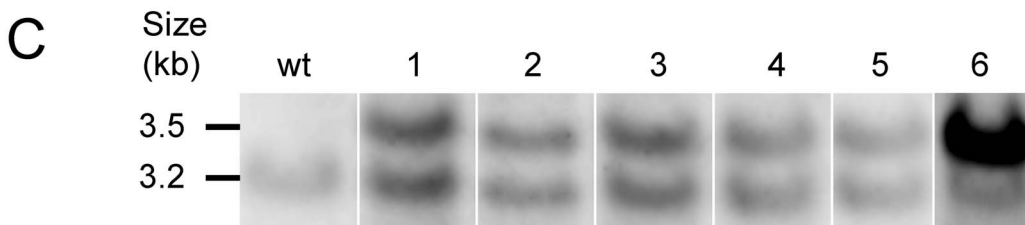

**Figure 1. Generation of BAC transgenic mice.** (A) *Aicda* on the BAC clone (RP24-6817) was modified as described in Methods. Open boxes with numbers denote the first to third exons. An expression cassette for cre and human CD2 was inserted into the second exon as indicated. In the enlarged views of regulatory elements in regions 2 or 4 that were deleted or replaced by Frt sites (closed triangle), the number indicates the relative position (base pair) from the transcription initiation site. Binding elements are marked by a symbol showing the name of the factor. A thick line indicates the probe used for Southern blotting. The *HindIII* restriction sites adjacent to the probe are marked by an H. pA, poly A signal. (B) Characteristic cellular phenotype of Aid-cre-cd2 TG mice crossed with *rosa*-tdRFP mice. When stimulation induces the *Aicda* promoter (*pAicda*), the BAC transgene expresses cre recombinase and the hCD2 marker. Cre recombinates loxP and loxP2227 sites in the indicator gene, *rosa*-tdRFP, and thereby irreversibly expresses RFP. RFP expression is maintained after *pAicda* activity declines. (C) Southern blot analysis with the probe defined in A: Genomic DNA from wild-type (lane wt), Aid-cre-cd2 (lane 1), dR2-ac-cre (lane 2), dME-ac-cre (lane 3), dR4-ac-cre (lane 4), dCEBP-ac-cre (lane 5), and *Aicda*-cre (lane 6) [17] mice was digested by *HindIII*; 3.2- and 3.5-kb bands correspond to endogenous and transgenic loci, respectively. doi:10.1371/journal.pone.0061433.g001

All mice were bred and maintained in specific pathogen-free conditions at Kyoto University and at the RIKEN CDB.

*Rosa*-tdRFP [33] mice were bred and maintained in specific pathogen-free conditions at the Institute of Laboratory Animals at the Graduate School of Medicine, Kyoto University. These animals were intercrossed to obtain double-mutant animals.

### Immunization of Mice

Sheep red blood cells (SRBC) were washed by PBS for three times and were suspended in PBS at a concentration of  $5 \times 10^9$ /ml. Hundred micro-l of the SRBC suspension was given intraperitoneally.

### Southern Blot and PCR Analysis

DNA for PCR and Southern blot analysis was obtained by tail biopsy. For Southern blotting, the DNA was digested with *HindIII*, separated on a 0.8% agarose gel, and transferred to a nylon membrane (Roche). The blots were air-dried, and the DNA crosslinked using UV light. The DIG-labeled DNA probes indicated in Fig. 1 were used for hybridization in ULTRAhyb Buffer (Ambion; Applied Biosystems). All procedures using the DIG application system (Roche) were performed according to the manufacturer's recommendations. Screening of the transgenes was done by PCR with primers CreFP33 5'-CGGCATGGTG-CAAGTTGAATAAC-3' and CreRP34 5'-GCTAAC-CAGCGTTTTTCGTTCTGC-3', which amplify 458 bp DNA of the cre-coding region.

The following PCR primers were used to confirm the generated BAC constructs:

dR2-Fwd 5'-ATATGCAGCTCATGATGAGCCA-3', dR2-Rv 5'-GTTATAATAATAAGCACAGGTA-3'; dR4-Fwd 5'-TGAATTGGTTCACCTCCCCCTA-3', and dR4-Rv 5'-CAGCTTACAGGAAACTTCCCCA-3'.

### Antibody Staining, hCD2 Detection, and Cell Sorting

Single-cell suspensions from tissues, in FACS buffer (PBS supplemented with 4% FBS, 1 mM HEPES, and 0.6% sodium citrate), were stained with the following monoclonal antibodies conjugated with FITC, PE, PE-Cy7, APC, APC-Cy7, Biotin, or Pacific-Blue: antibodies specific for B220 (RA3-6B2), CD93 (AA4.1), IgM (R6-60.2), IgD (11–26), CD38 (90), CD3 (500A2), CD4 (GK1.5), CD8 (53-6.7), CD44 (IM7), CD62L (MEL-14), and hCD2 (RPA-2.10) (BD Biosciences or eBioscience). Biotinylated reagents were detected with either streptavidin-APC-Cy7 or streptavidin-APC (BD Biosciences). Stained cells were analyzed by FACSCantoII (BD Biosciences) or sorted by FACSARIA. The acquired data were analyzed using FlowJo software (Tree Star, Inc.). Live lymphocyte populations were gated according to forward and side scatters, and 7-amino-actinomycin D staining.

### Quantitative Real-time PCR

Total RNA was extracted by TRIzol reagent (Invitrogen Life Technologies), and cDNA was synthesized with TaqMan<sup>®</sup> Reverse Transcription Reagents (Applied Biosystems). Gene expression was assessed by real-time PCR using iQ Sybr green supermix (Bio-Rad Laboratories, Inc.). The data were normalized to the *Gapdh* expression. The following primers were used: *hCD2*-forward 5'-GACCACCAGCCTGAGTGCAA-3', *hCD2*-reverse 5'-GCTCCTCATCATTTCTCCGAC-3'; *Gapdh*-forward 5'-TGTGTCCGTCGTGGATCTGA-3', *Gapdh*-reverse 5'-CCTGCTTCACCACCTTCTTGAT-3'.

## Results

### Construction of *Aicda* BAC Transgenic Mice

To examine the *in vivo* function of elements that regulate *Aicda*, we used a BAC transgenic strategy. We used the BAC clone RP24-6817, which covers the 190-kb region of *Aicda* and its flanking regions, to establish a reliable system for monitoring *Aicda* expression [17]. We used a basic construct, Aid-cre-cd2, which harbors a bicistronic expression cassette for human CD2 and cre in the AID coding region (Fig. 1A) [32]. The *Aicda* BAC contains three regulatory regions (regions 2, 3, and 4) in addition to the promoter (region 1), as assessed by an *in vitro* culture system [16,27,28]. The locations and binding motifs of regions 2 and 4 are described above (Fig. 1A and the reference [28] for detailed information).

To examine the *in vivo* function of the *Aicda* regulatory elements identified *in vitro*, we added deletion mutations to the basic construct to obtain four additional constructs: dR2-ac-cre, in which region 2 was entirely deleted; dME-ac-cre, in which the region 2 c-Myb- and E2F-binding sites—the silencing elements—were deleted; dR4-ac-cre, in which region 4 was entirely deleted; and dCEBP-ac-cre, which contains a restrictive deletion of the two C/EBP sites (Fig. 1A and Fig. S1). We generated transgenic mice carrying these BAC constructs and crossed them with the *rosa*-tdRFP reporter mouse [33]. In this system, *Aicda* promoter activation can be visualized by hCD2 and RFP for ongoing and past AID expression, respectively (Fig. 1B). It was previously reported, that the cre-loxP-mediated irreversible expression of reporters at the *rosa26* locus enables more sensitive detection than the direct staining of hCD2, even allowing the visualization of transient and/or marginal activation of the *Aicda* promoter in immature B cells and memory T cells [17]. All mice described in this paper were crossed with the *rosa26*-tdRFP reporter strain unless otherwise described.

### *Aicda* Expression is Positively Regulated by Regions 2 and 4

We chose 3 or 5 lines of transgenic mice for each construct (Table 1), each line carrying a single copy of the transgene (approximately 4 transgene copies were detected in the transgenic mouse described previously) (Fig. 1C) [17]. In all of these Aid-cre-cd2 lines, about one percent of the splenic B cells were RFP+,

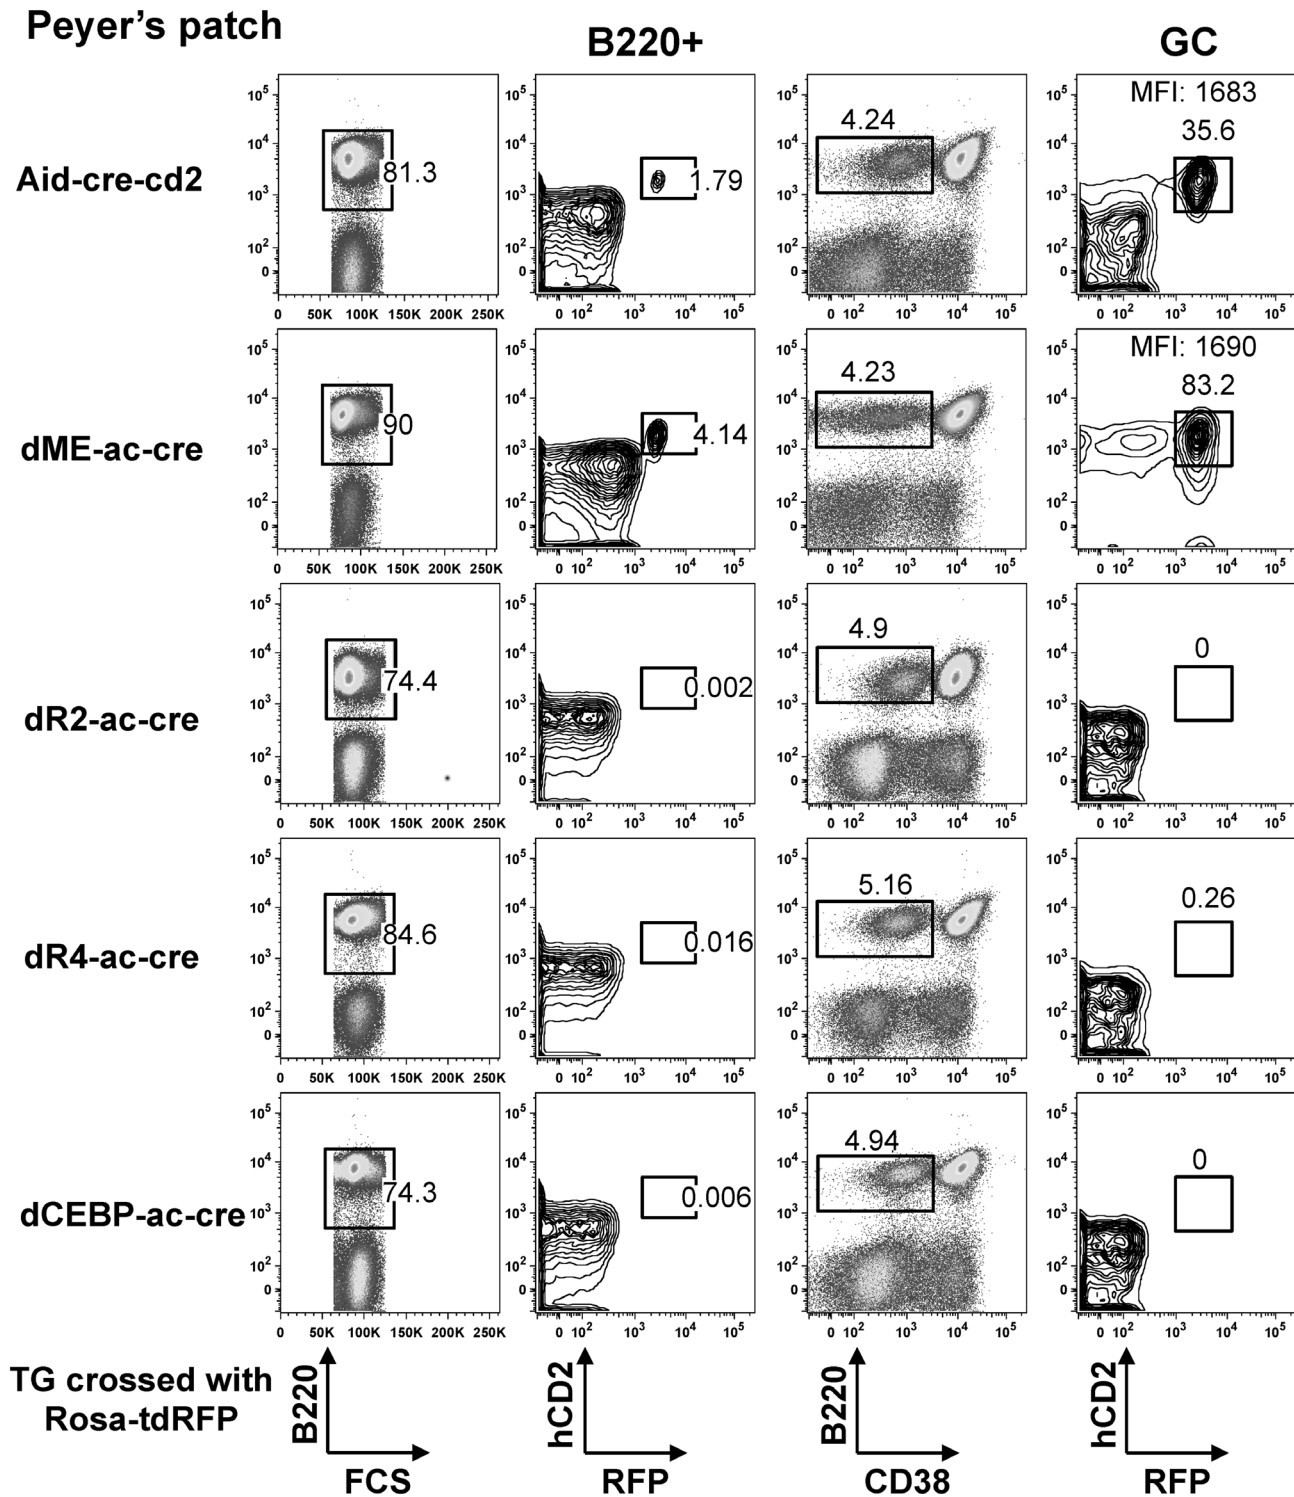

**Figure 2. Dual-reporter hCD2 and RFP expressed in *in vivo*-activated B cells of each strain of *rosa-tdRFP*-crossed BAC transgenic mice.** RFP and hCD2 in B cells (B220+) or germinal-center (GC) B cells (B220+CD38-) in Peyer's Patches (mice at 8 weeks of age) from Aid-cre-cd2 line 1; dME-ac-cre line 1; dR2-ac-cre line 1; dR4-ac-cre line 1; or dCEBP-ac-cre line 1 mice. All mice were crossed with the *rosa-tdRFP* reporter strain. The mean fluorescent intensity (MFI) of hCD2 staining of the gated population and the percentage within the gate are indicated. FACS results are representative of three independent experiments with three mice each. doi:10.1371/journal.pone.0061433.g002

indicating that the basic BAC transgene was expressed similarly in these animals (Table 1). RFP and hCD2 were strongly expressed in germinal-center B cells, in which *Aicda* is actively transcribed;

about 35% of the B220+CD38- gated population was positive for both reporters (Fig. 2). We next examined germinal-center B cells in the Peyer's patches of mice carrying manipulated BAC reporter

**Table 1.** Percentage of RFP+ Lymphocytes (mean  $\pm$  SEM).

| Construct    | line | Spleen         |                    | mLN           |                    | Peyer's patch        |                    |
|--------------|------|----------------|--------------------|---------------|--------------------|----------------------|--------------------|
|              |      | B(%)           | T(%)               | B(%)          | T(%)               | B(%)                 | T(%)               |
| Aid-cre-cd2  | #1   | 1.0 $\pm$ 0.05 | 0                  | 0.9 $\pm$ 0.2 | 0                  | 2.8 $\pm$ 0.3        | 0                  |
|              | #2   | 1.1 $\pm$ 0.2  | 0                  | 0.8 $\pm$ 0.2 | 0                  | 2.9 $\pm$ 0.7        | 0                  |
|              | #3   | 1.3 $\pm$ 0.4  | 0                  | 0.8 $\pm$ 0.1 | 0                  | 3.1 $\pm$ 0.2        | 0.03 $\pm$ 0.02    |
| dR2-ac-cre   | #1   | 0              | 0                  | 0             | 0                  | 0                    | 0                  |
|              | #2   | 0              | 0                  | 0             | 0                  | 0                    | 0                  |
|              | #3   | 0              | 0                  | 0             | 0                  | 0                    | 0                  |
|              | #4   | 0              | 0                  | 0             | 0                  | 0                    | 0                  |
|              | #5   | 0              | 0                  | 0             | 0                  | 0                    | 0                  |
| dR4-ac-cre   | #1   | 0              | 0                  | 0             | 0                  | 0.005<br>$\pm$ 0.001 | 0                  |
|              | #2   | 0              | 0                  | 0             | 0                  | 0                    | 0                  |
|              | #3   | 0              | 0                  | 0             | 0                  | 0                    | 0                  |
|              | #4   | 0              | 0                  | 0             | 0                  | 0                    | 0                  |
|              | #5   | 0              | 0                  | 0             | 0                  | 0                    | 0                  |
| dCEBP-ac-cre | #1   | 0              | 0                  | 0             | 0                  | 0                    | 0                  |
|              | #2   | 0              | 0                  | 0             | 0                  | 0                    | 0                  |
|              | #3   | 0              | 0                  | 0             | 0                  | 0                    | 0                  |
|              | #4   | 0              | 0                  | 0             | 0                  | 0                    | 0                  |
|              | #5   | 0              | 0                  | 0             | 0                  | 0                    | 0                  |
| dME-ac-cre   | #1   | 1.9 $\pm$ 0.1  | 0                  | 1.2 $\pm$ 0.2 | 0.01<br>$\pm$ 0.01 | 4.2 $\pm$ 0.8        | 0.06<br>$\pm$ 0.01 |
|              | #2   | 1.9 $\pm$ 0.2  | 0.07<br>$\pm$ 0.06 | 1.2 $\pm$ 0.1 | 0.02<br>$\pm$ 0.01 | 4.4 $\pm$ 0.8        | 0.06<br>$\pm$ 0.06 |

All animals were crossed with *rosa-tdRFP*.

Three mice from each line were analyzed.

Percentage of RFP+ B cells in mice carrying the dME-ac-cre transgene was significantly higher than in mice carrying the Aid-cre-cd2 transgene.  $P = 0.0067$  (Spleen),  $P = 0.0034$  (mLN),  $P = 0.0021$  (Peyer's patch) by two-tailed unpaired Student's t-test. mLN, mesenteric lymph node.

doi:10.1371/journal.pone.0061433.t001

constructs. Deletions of region 2 or 4 completely abolished the *Aicda* expression on the transgene (Fig. 2). *Aicda* was similarly inactivated in the independent founder lines dR2-ac-cre and dR4-ac-cre (five each) (Table 1). We conclude that both region 2 and region 4 are essential for normal *Aicda* expression in activated B cells *in vivo*.

Region 4 contains binding motifs for NF- $\kappa$ B, STAT6, and Smad3/4, which are involved in the signaling pathways of CD40, IL-4, and TGF- $\beta$ , respectively [34–36]; an *in vitro* reporter assay also demonstrated the importance of two C/EBP sites in this region [28]. The dCEBP-ac-cre construct, in which the two C/EBP sites in region 4 were deleted, along with the intervening sequence (Fig. S1), consistently failed to express the *Aicda* reporters, indicating that these C/EBP sites are in fact indispensable for region 4's enhancer activity in activated germinal-center B cells (Fig. 2 and Table 1).

### E2F and c-Myb Motifs Suppress *Aicda* Activity

In contrast to the enhancer function of the C/EBP sites in region 4, the E2F- and c-Myb binding sites act as silencers *in vitro* [28]. To determine whether these binding sites were responsible for silencing *Aicda* in germinal-center B cells, we examined

transgenic lines carrying the dME-ac-cre construct. In contrast to the dR2-ac-cre transgenic mice, both reporters were expressed at elevated levels in the Peyer's patch germinal-center B cells in dME-ac-cre transgenic mice compared with Aid-cre-cd2 mice (Fig. 2). The percentage of germinal-center B cells that were positive for hCD2 or RFP in the dME-ac-cre mice was almost double that seen in Aid-cre-cd2 transgenic mice. The mean fluorescent intensity of hCD2+ B cells was similar in the Aid-cre-cd2 and dME-ac-cre mice (Fig. 2), suggesting that the efficiency of *Aicda* expression was similar once activated. In addition, the percentage of RFP-positive B cells in various lymphoid organs was significantly higher in the dME-ac-cre than in the Aid-cre-cd2 transgenic mice (Fig. 2 and Table 1). These results suggest that the *Aicda* promoter was more readily activated in dME-ac-cre than in Aid-cre-cd2 mice. We sorted germinal-center B cells, as well as B cells at other developmental stages, and used RT-qPCR to determine whether the increased percentage of cells positive for hCD2 or RFP correlated with the mRNA level. Consistent with the FACS analysis, the reporter-gene mRNA levels in the sorted cells were significantly higher in the dME-ac-cre than in the Aid-cre-cd2 transgenic mice (Fig. 3). Taken together, these results indicate that the E2F and c-Myb elements negatively modulate the *Aicda* promoter's activity in germinal-center B cells *in vivo*.

To determine whether deleting these silencer elements, E2F and c-Myb, would upregulate the modest AID expression found in immature B cells, we examined the reporter expression in developing B cells in dME-ac-cre mice. These B cells did not robustly express hCD2 or RFP in immature stages (Fig. 4AB). However, the hCD2 mRNA levels in the sorted preB and transitional B cells were elevated in the dME-ac-cre ( $p < 0.05$ ) as compared to the *Aicda*-cre-cd2 mice (Fig. 3B). Notably, the RT-qPCR detection appeared to be more sensitive than BAC reporters. These results support the idea that the E2F and c-Myb elements in region 2 negatively regulate the *Aicda* promoter in immature B cells.

Germinal centers in Peyer's patches develop spontaneously in response to continuous stimulation from gut flora [37]. To determine whether the increased induction of RFP-positive cells in the dME mutant was dependent on chronic stimuli, we immunized naïve mice by intra-peritoneal sheep red blood cell (SRBC) injection and analyzed the germinal-center B cells on day 7, the early phase of the immune response [38]. Germinal-center B cells in the spleen were gated as B220+CD38– cells [39]. As in the Peyer's patches, a much higher percentage of dME-ac-cre spleen germinal-center B cells were positive for RFP or hCD2 than *Aicda*-cre-cd2 cells (Figure 5). Therefore, the c-Myb and E2F elements' silencing activity negatively regulates *Aicda* promoter activation at the initiation stage of B-cell activation.

### Deletion of Silencer Elements in Region 2 does not Enhance the *Aicda* Expression in T cells

Since region 2's silencing activity is not limited to B cells [28,40], it might be responsible for repressing *Aicda* in other cell lineages. *Aicda* is weakly expressed in chronically activated T cells that coincide with the development of the IL-10-producing T-cell subpopulation [17]. Reporter expression did not indicate a significant fraction of RFP+ cells among the T cells of the dME-ac-cre mice (Fig. 6). Although we were able to detect RFP+ T cells in our previously reported transgenic mice, which carried multiple copies of the basic construct *Aid-cre-cd2*, this was not the case with the present single-copy transgenic mice (Table 1). Since the dME-ac-cre construct was efficiently expressed in germinal-center B cells, this lack of expression is not caused by the functional inactivation of the transgene itself. Although c-Myb and E2F

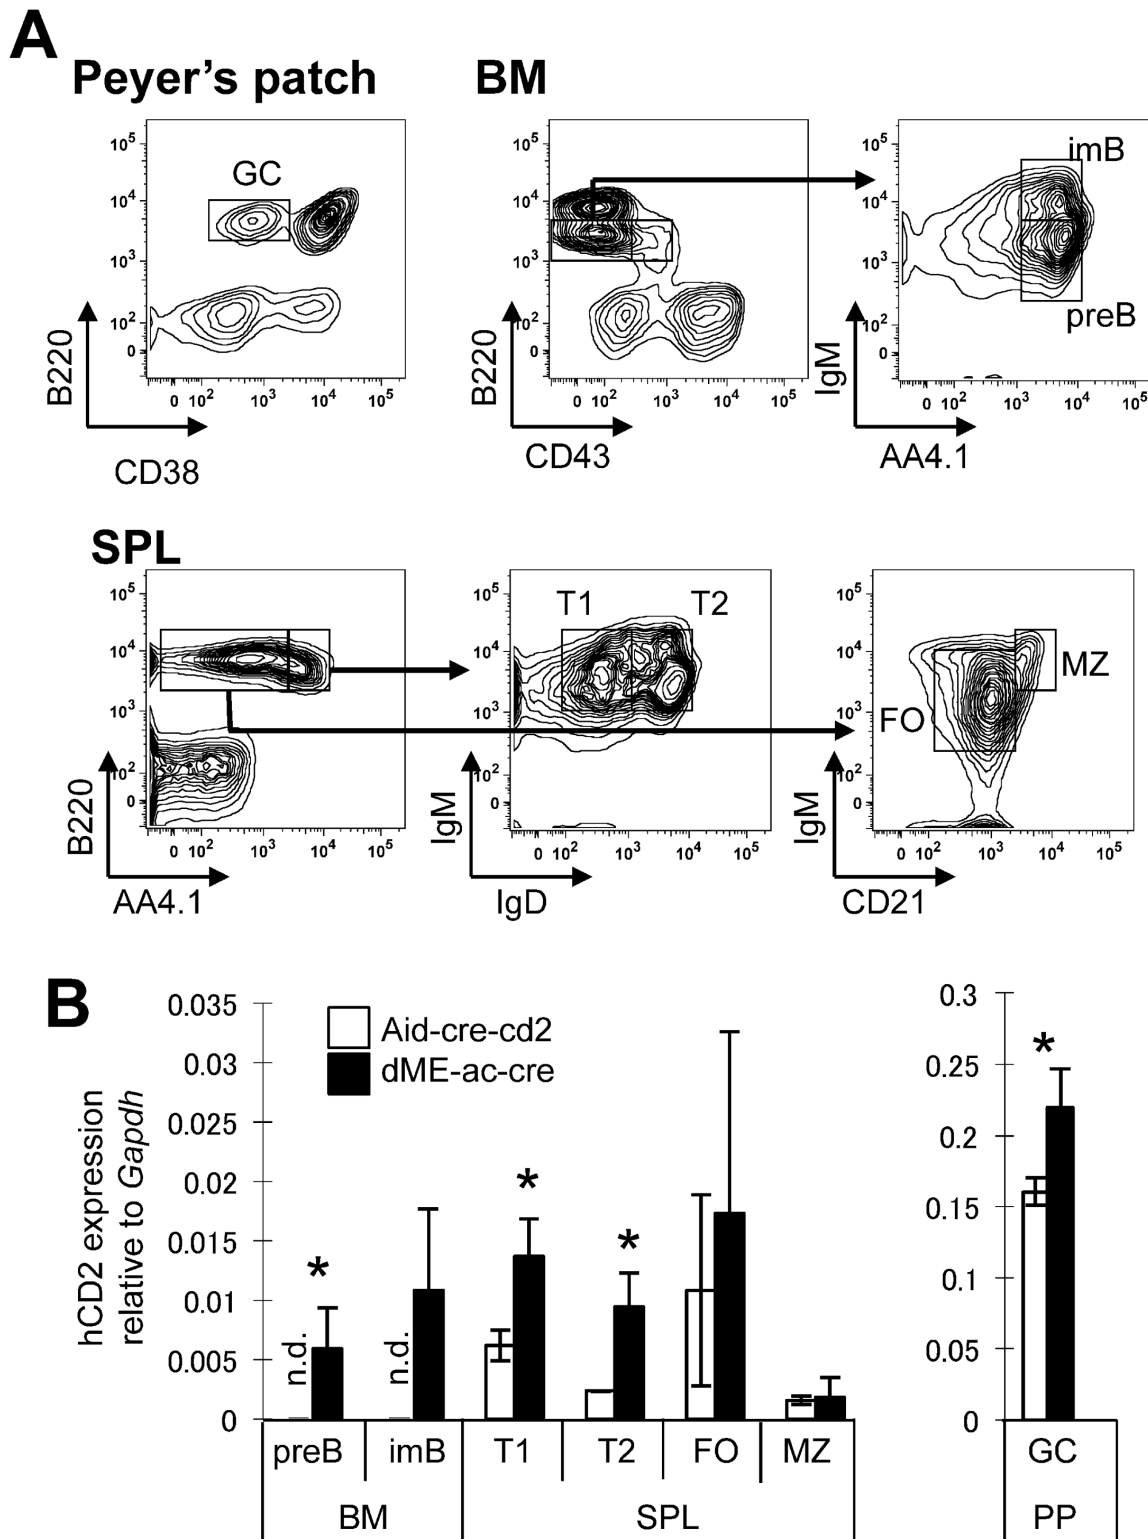

**Figure 3. Positive correlation between hCD2 mRNA and the number of RFP+ cells among germinal-center B cells in dME-ac-cre mice.** (A) Representative sorting and gating strategies for samples from the germinal centers of Peyer's patches (PP), bone marrow (BM), and spleen (SPL) of 8-week-old *Aid-cre-RFP* mice. Cells were stained by the indicated markers for FACS analysis. Sorting gates are indicated. (B) RT-qPCR analysis of hCD2 in sorted cells. *Aid-cre-cd2* line 1 and *dME-ac-cre* line 1 mice (8 weeks old) were used; values were normalized to the *Gapdh* expression. Data represent means  $\pm$  s.d. (bars) of three independent experiments. Asterisk indicates a mild statistical difference between *Aid-cre-cd2* and *dME-ac-cre* mice, assessed by a two-tailed Student's t-test (preB,  $p = 0.042$ ; T1,  $p = 0.02$ ; T2,  $p = 0.014$ ; GC,  $p = 0.024$ ). T1, transitional B cell; T2, transitional B cell 2; MZ, marginal zone B cell; FO, follicular B cell; GC, germinal-center B cell; n.d., not detectable.  
doi:10.1371/journal.pone.0061433.g003

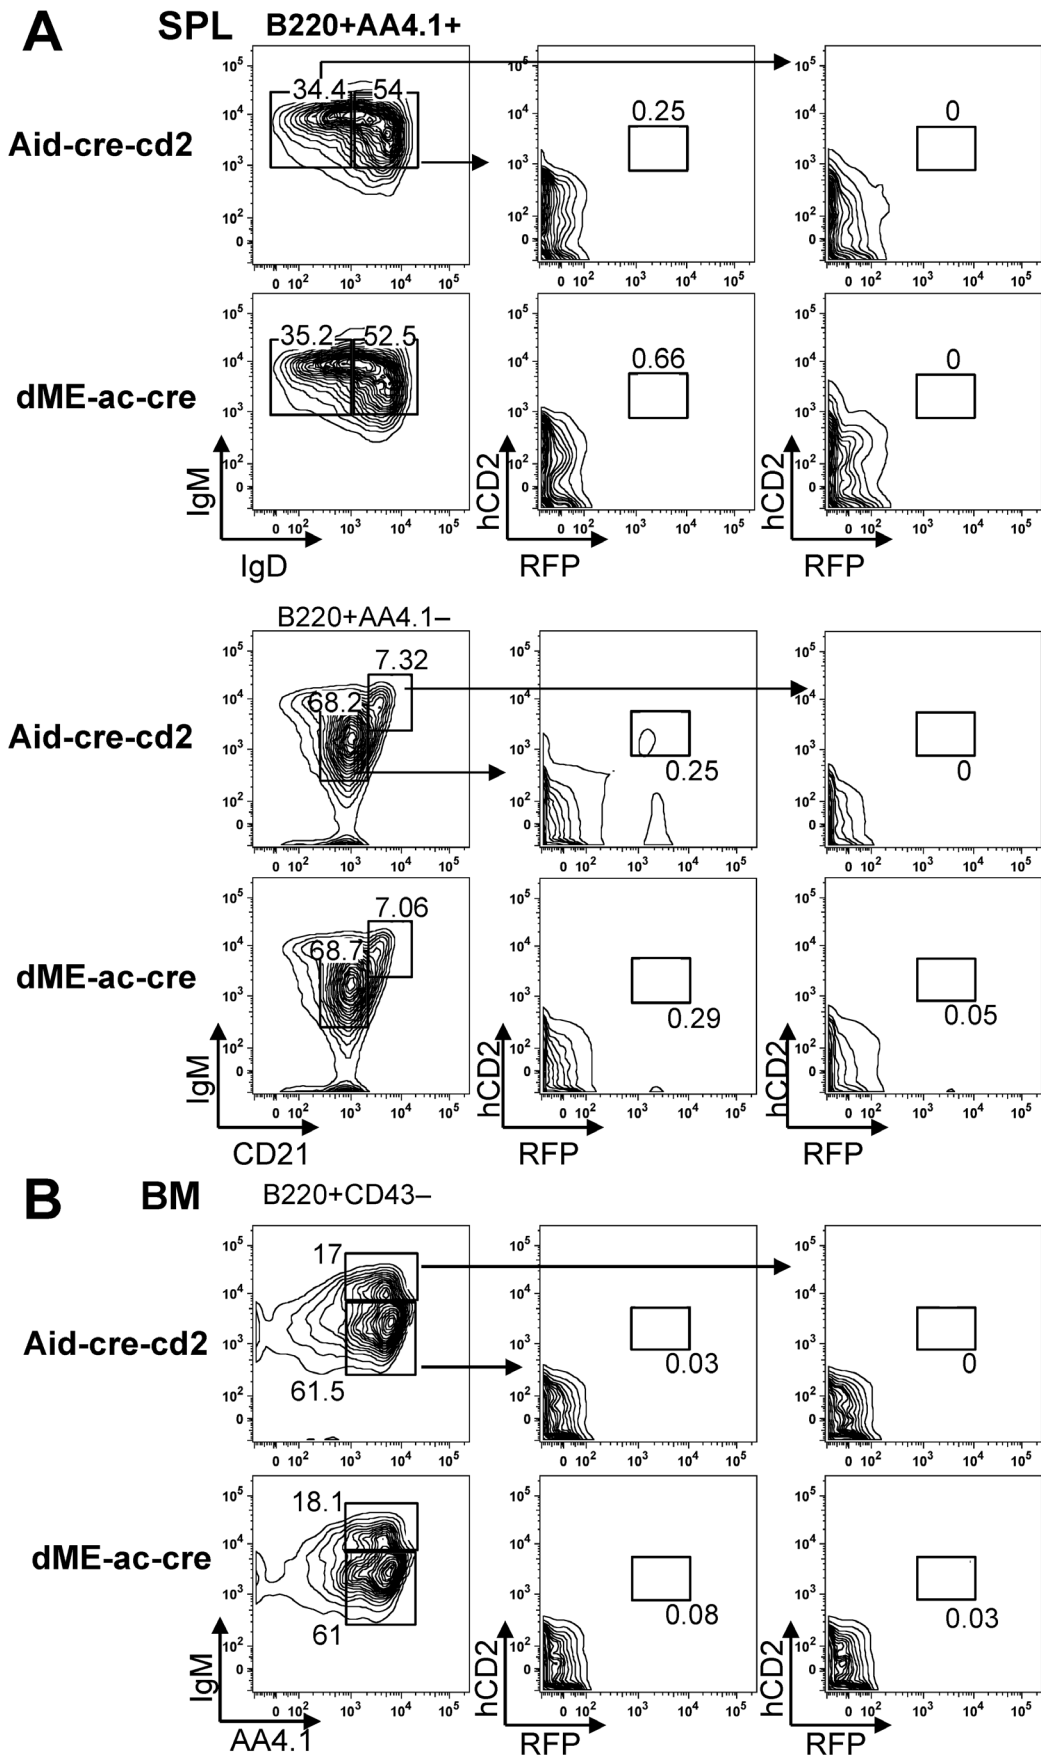



**Figure 4. FACS analysis of hCD2 and RFP expression in *Aid-cre-cd2* and *dME-ac-cre* B cell-lineage lymphocytes.** (A) Spleen (SPL) and (B) bone marrow (BM) B cells of 8-week-old *Aid-cre-cd2* line 1 and *dME-ac-cre* line 1 mice were stained for the indicated markers for FACS analysis. Numbers shown in each gate indicate the percentage of cells. FACS results are representative of three independent experiments with three mice each.  
doi:10.1371/journal.pone.0061433.g004

strongly suppress the *Aicda* promoter, even a marginal level of *Aicda* expression in T cells appears to require additional positive regulation [28].

## Discussion

The AID molecule is central to the antigen-induced alteration of immunoglobulin genes in activated B cells, and its mutagenic activity can induce tumorigenesis in various types of cells [10]. AID is also thought to play a part in immature B-cell selection and T-cell activation, though it is expressed at much lower levels in these cells than in activated B cells [17,25,26]. It is thus clear that the *Aicda* promoter is finely regulated by cell lineage and the cellular environment. Determining how the *Aicda* gene is repressed in most cells, moderately expressed in response to some environmental stimuli, and fully expressed in activated B cells is critical for clarifying AID's physiological and pathological functions. However, *Aicda* expression under physiological conditions has not been elucidated in previous *in vitro* or *ex vivo* cellular studies [16,27–31,41].

### Region 2's Critical Roles in B-cell-specific AID Expression

In the present study, we demonstrated that regions 2 and 4 are important for inducing *Aicda* in activated B cells *in vivo*. Although we did not evaluate the activity of region 3 [16], all of the constructs used in this study contained region 3. Therefore, it is clear that region 3 cannot functionally compensate for the lack of

region 2 or region 4. Region 2 contains binding sites for B-cell-specific transcription factors, namely, the Pax5 and E proteins. The present *in vivo* results are consistent with our previous *in vitro* report showing enhancer activity in this region [28,31]. In addition to the B-cell-specific enhancers, E2F- and c-Myb-binding sites in region 2 functioned as silencers in the *in vitro* reporter assay. These silencers counteracted positive regulatory elements in region 2 and region 4, in both B and non-B cells [28]. To elucidate the mechanism for lineage-specific and activation-specific AID induction, it was important to evaluate the E2F and c-Myb sites' silencing function under physiological conditions. As expected, these elements disturbed *Aicda* promoter activation in *in vivo*-activated B cells. Deletion of the E2F and c-Myb sites (*dME-ac-cre*) drastically increased the percentage of hCD2-positive B cells in germinal centers, suggesting that these elements reduce the frequency of *Aicda* promoter activation within the gated population. On the other hand, when comparing the *Aid-cre-cd2* and *dME-ac-cre* hCD2-positive germinal-center B cells, the mean fluorescent intensity of hCD2 staining was not significantly different. Since the hCD2 fluorescent intensity correlates with the reporter gene's transcription efficiency in individual cells, this observation indicates that the E2F and c-Myb sites do not affect the active reporter gene's transcription efficiency. These results may suggest that E2F and c-Myb negatively regulate the *Aicda* promoter's activation, but do not affect its transcription efficiency once activated.

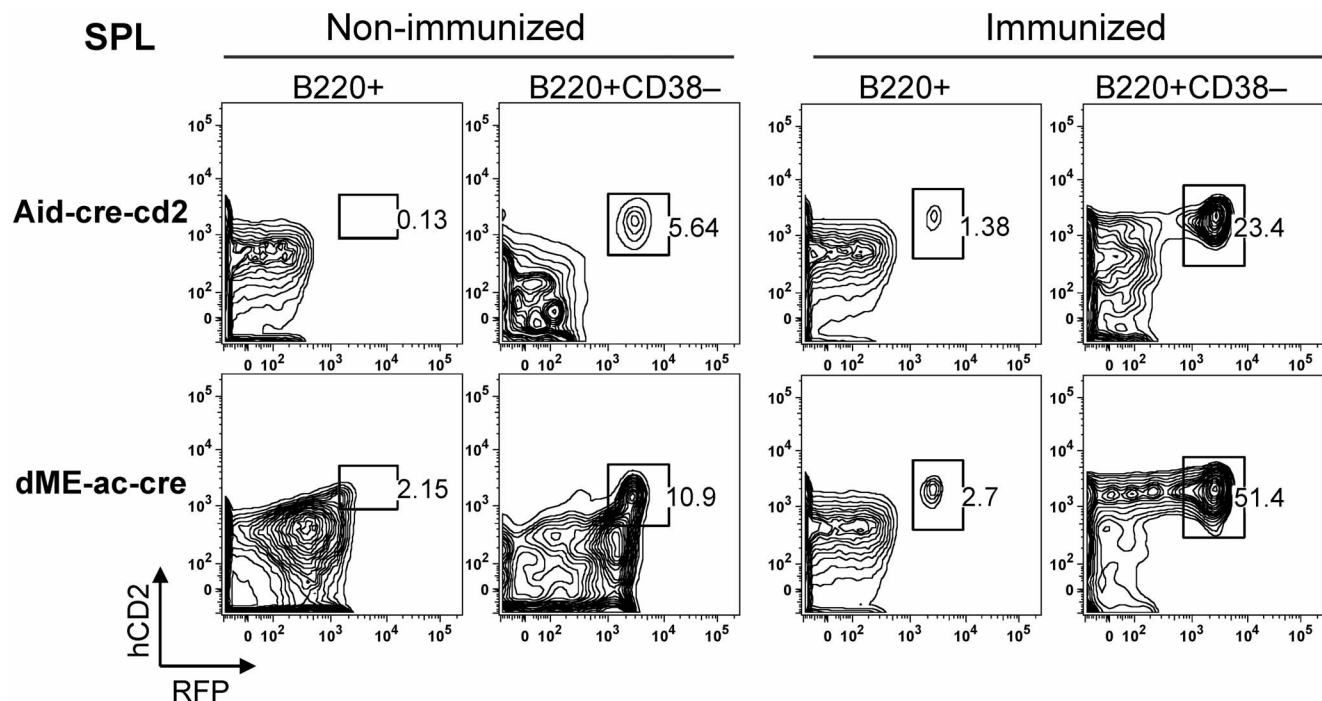

**Figure 5. FACS analysis of hCD2 and RFP expression in immunized mice.** *Aid-cre-cd2* line 1 and *dME-ac-cre* line 1 mice (12 weeks of age) were immunized with SRBC and sacrificed on day 7 after immunization. The percentage of hCD2+ and RFP+ cells among B cells or germinal-center (GC) B cells is indicated. SPL, spleen. FACS results are representative of two independent experiments.  
doi:10.1371/journal.pone.0061433.g005

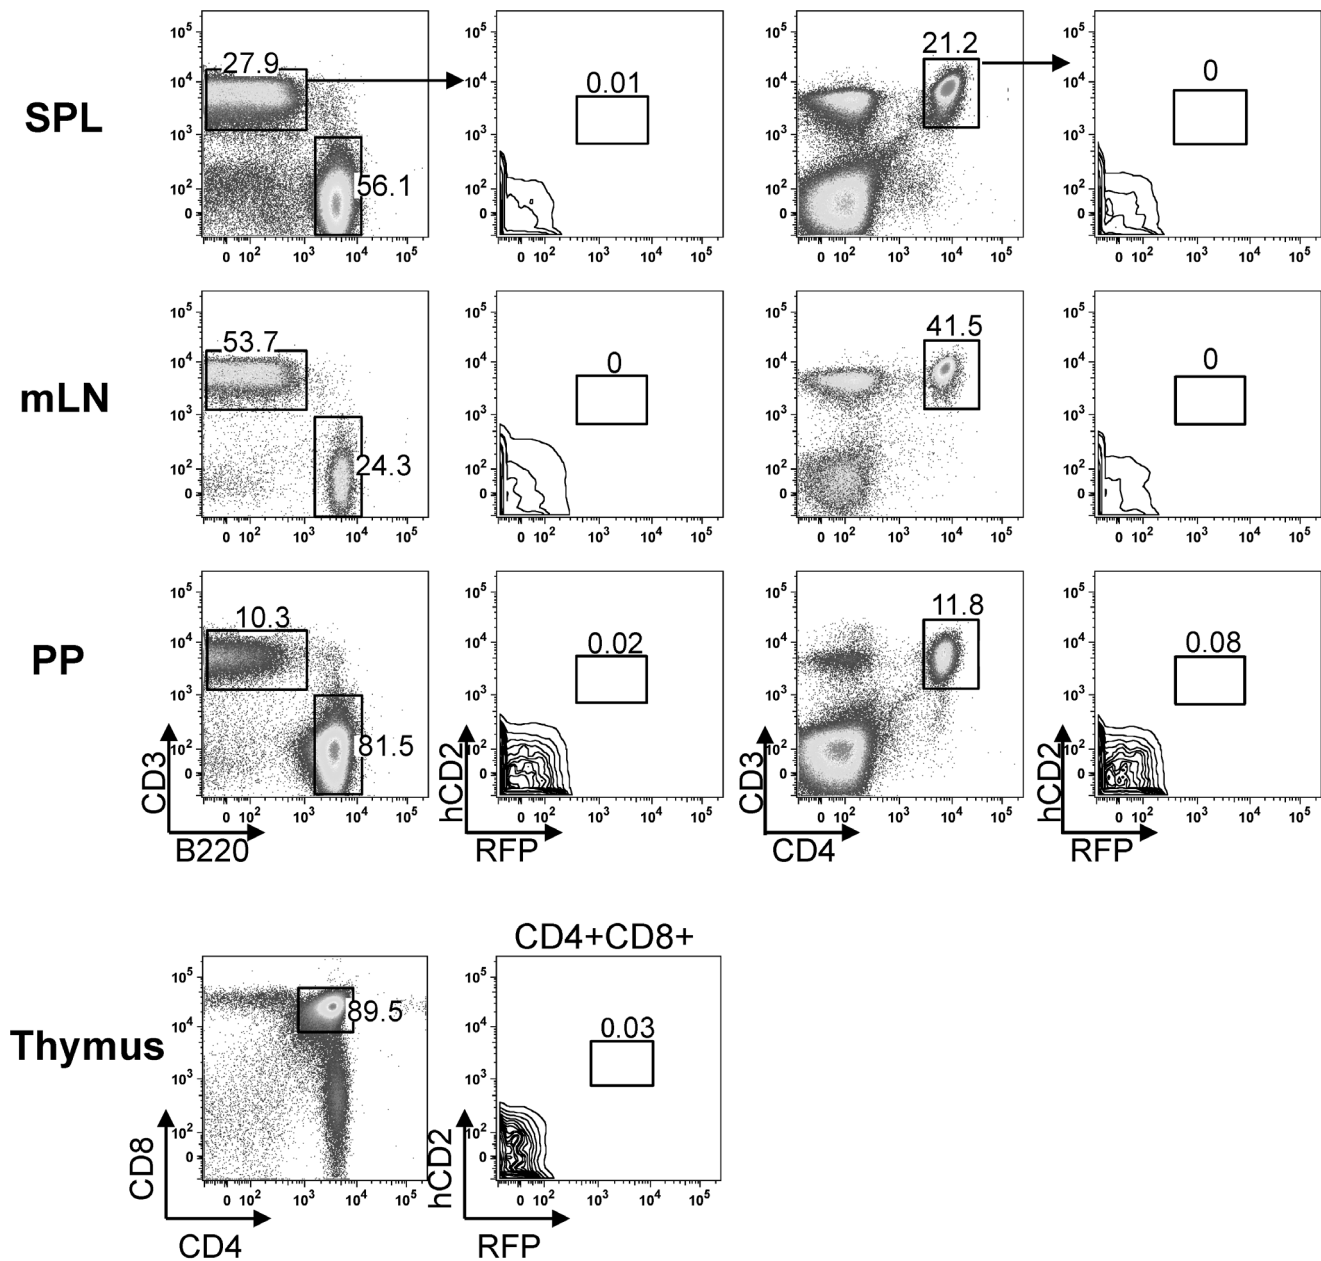

**Figure 6. Lack of hCD2 and RFP expression in the peripheral T cells of dME-ac-cre mice.** FACS analysis of hCD2 and RFP expression in naïve CD3<sup>+</sup> or CD4<sup>+</sup>CD8<sup>+</sup> T cells isolated from (A) spleen (SPL), (B) mesenteric lymph nodes (mLN), (C) Peyer's patches (PP), and CD4<sup>+</sup>CD8<sup>+</sup> T cells isolated from the thymus (D). Data are representative of three independent experiments. Data shown are from a 24-week-old mouse. Numbers in panels show the percentage of gated cells of each gate. doi:10.1371/journal.pone.0061433.g006

*Aicda* is usually expressed strongly only in activated B cells. If *Aicda* silencing were not stably maintained in other cells, even minimal exposure to various environmental stimuli could induce this dangerous internal mutagen. In this context, E2F proteins are known to associate with the pRB protein to function as a constitutive and tentative gene repressor [42]. Because the silencers in region 2 act in other cell lineages in addition to B cells [28], these silencers would also be expected to contribute to B-cell-specific *Aicda* suppression. We expected to observe ectopically expressed *Aicda* reporters in the absence of the silencers (dME-ac-cre mice). However, we did not observe ectopic or enhanced reporter expression in either immature B cells or

developing T cells, in which the *Aicda* promoter is activated modestly under normal conditions [17]. This finding suggests that removing these silencers is not sufficient to induce ectopic *Aicda* expression. It is likely that the activity of the B-cell-specific enhancer proteins (Pax5 and E proteins) is not sufficient to activate the *Aicda* promoter in most cells, including immature B cells and activated T cells; this indicates that a coordinated balance between enhancers and silencers is critical for lineage- and activation-specific AID expression. Alternatively, there might be other unidentified silencers that are required for maintaining lineage specificity. However, this is less likely, since previous extensive

deletion analysis did not find other obvious silencer elements, either in the *AID* gene or in its flanking regions [28].

A previous study clearly showed that a BAC transgenic system using cre recombinase coupled with floxed RFP can detect low-level *Aicda* expression [17]. However, we could not visualize *Aicda* expression records in immature B and activated T cells using this system in the present study. Since *Aicda* expression in these cells has been confirmed by other methodologies by various groups, it is unlikely that our previous observation was an artifact [16,17,23,24]. Rather, it seems that the sensitivity of the current study's system is lower than that reported by Qin et al. (2011). It is likely that this difference is due to the number of transgene copies; transgenic mice used in the previous study carried about 4 copies, while the current study used only animals with single-copy integration.

### Region-4 Enhancers Positively Regulate *Aicda*

Region 4's role in *Aicda* regulation was first demonstrated *in vitro* by Tran et al. [28]. Our current study convincingly demonstrated *in vivo* the critical role of region 4's enhancer elements, which include binding sites for NF- $\kappa$ B, STAT6, Smad3/4, and C/EBP. NF- $\kappa$ B, STAT6, and Smad are major transcription factors in the CD40, IL-4, and TGF- $\beta$  signaling pathways, respectively. Although dCEBP-ac-cre selectively deleted only the tandem C/EBP-binding elements, leaving the other elements intact, it completely abolished the expression of *Aicda* reporters. This demonstrated C/EBP's indispensable role in regulating *Aicda*, as was previously shown *in vitro*.

While some factors are well-known to contribute to CSR induction, the involvement of C/EBP proteins has not been previously appreciated. Chromatin immunoprecipitation assays have suggested that C/EBP $\beta$  binds to region 4 [28]. Since C/EBP $\beta$  can physically interact with NF- $\kappa$ B and modulate its activity [43–45], C/EBP $\beta$  and NF- $\kappa$ B can function cooperatively and are often involved in signaling pathways mediated by toll-like receptors and cytokines, which are associated with inflammatory reactions [43,45–48].

For example, in renal medullary interstitial cells, a mutation of the C/EBP-binding site abolishes NF- $\kappa$ B-dependent activation of

the COX2 promoter, which contains a tandem array of NF- $\kappa$ B- and C/EBP-binding sites [45]. These results suggest that the C/EBP pathway dominantly regulates the tonicity-induced COX2 expression. The NF- $\kappa$ B- and C/EBP-binding sites in region 4 are separated by almost 100 bp, which is relatively close, although not as close as in the COX2 gene. It is well established that AID is induced by CD40 stimulation, which activates NF- $\kappa$ B. In this context, C/EBP $\beta$ 's critical role in *Aicda* expression *in vivo* is reasonable. It will be interesting to elucidate the molecular mechanisms by which C/EBP and NF- $\kappa$ B interact and cooperatively regulate *Aicda* expression. In summary, the activation of AID expression *in vivo* requires not only B-cell-specific enhancers in region 2, but also stimulation-dependent enhancers in region 4.

### Supporting Information

**Figure S1 Confirmation of deletion/replacement of regulatory elements on BAC constructs.** PCR analysis confirmed the deletion of region 2 (0.5-kb) in dR2-ac-cre and that of region 4 (0.8-kb) in dR4-ac-cre (A) (B). Sequencing analyses to confirm the modifications introduced to dME-ac-cre (C) and dCEBP-ac-cre (D) were shown. The wild type sequences around the targeted elements (boxed) are presented. Sequencing chromatograms were shown below; corresponding region were indicated by dotted lines.  
(PDF)

### Acknowledgments

We thank Dr. Hans Joerg Fehling for *rosa*-tdRFP mice; Dr. Meinrad Busslinger for *Aicda*-cre mice; Ms Satsuki Kitano for technical assistance.

### Author Contributions

Conceived and designed the experiments: TH HN. Performed the experiments: LTH MK MN HN. Analyzed the data: LTH HN. Contributed reagents/materials/analysis tools: LTH MK MN GS HM. Wrote the paper: TH HN.

### References

- Muramatsu M, Kinoshita K, Fagarasan S, Yamada S, Shinkai Y, et al. (2000) Class switch recombination and hypermutation require activation-induced cytidine deaminase (AID), a potential RNA editing enzyme. *Cell* 102: 553–563.
- Revy P, Muto T, Levy Y, Geissmann F, Plebani A, et al. (2000) Activation-induced cytidine deaminase (AID) deficiency causes the autosomal recessive form of the Hyper-IgM syndrome (HIGM2). *Cell* 102: 565–575.
- Nagaoka H, Muramatsu M, Yamamura N, Kinoshita K, Honjo T (2002) Activation-induced deaminase (AID)-directed hypermutation in the immunoglobulin Smu region: implication of AID involvement in a common step of class switch recombination and somatic hypermutation. *J Exp Med* 195: 529–534.
- Petersen S, Casellas R, Reina-San-Martin B, Chen HT, Difilippantonio MJ, et al. (2001) AID is required to initiate Nbs1/gamma-H2AX focus formation and mutations at sites of class switching. *Nature* 414: 660–665.
- Liu M, Duke JL, Richter DJ, Vinuesa CG, Goodnow CC, et al. (2008) Two levels of protection for the B cell genome during somatic hypermutation. *Nature* 451: 841–845.
- Kato L, Begum NA, Burroughs AM, Doi T, Kawai J, et al. (2012) Nonimmunoglobulin target loci of activation-induced cytidine deaminase (AID) share unique features with immunoglobulin genes. *Proc Natl Acad Sci U S A* 109: 2479–2484.
- Kotani A, Okazaki IM, Muramatsu M, Kinoshita K, Begum NA, et al. (2005) A target selection of somatic hypermutations is regulated similarly between T and B cells upon activation-induced cytidine deaminase expression. *Proc Natl Acad Sci U S A* 102: 4506–4511.
- Yamane A, Resch W, Kuo N, Kuchen S, Li Z, et al. (2011) Deep-sequencing identification of the genomic targets of the cytidine deaminase AID and its cofactor RPA in B lymphocytes. *Nat Immunol* 12: 62–69.
- Pavri R, Gazumyan A, Jankovic M, Di Virgilio M, Klein I, et al. (2010) Activation-induced cytidine deaminase targets DNA at sites of RNA polymerase II stalling by interaction with Spt5. *Cell* 143: 122–133.
- Honjo T, Kobayashi M, Begum N, Kotani A, Sabouri S, et al. (2012) The AID Dilemma: Infection, or Cancer? *Adv Cancer Res* 113: 1–44.
- Okazaki IM, Hai H, Kakazu N, Yamada S, Muramatsu M, et al. (2003) Constitutive expression of AID leads to tumorigenesis. *J Exp Med* 197: 1173–1181.
- Takai A, Toyoshima T, Uemura M, Kitawaki Y, Marusawa H, et al. (2009) A novel mouse model of hepatocarcinogenesis triggered by AID causing deleterious p53 mutations. *Oncogene* 28: 469–478.
- Ramiro AR, Jankovic M, Eisenreich T, Difilippantonio S, Chen-Kiang S, et al. (2004) AID is required for c-myc/IgH chromosome translocations *in vivo*. *Cell* 118: 431–438.
- Takizawa M, Tolarova H, Li Z, Dubois W, Lim S, et al. (2008) AID expression levels determine the extent of cMyc oncogenic translocations and the incidence of B cell tumor development. *J Exp Med* 205: 1949–1957.
- Muramatsu M, Sankaranand VS, Anant S, Sugai M, Kinoshita K, et al. (1999) Specific expression of activation-induced cytidine deaminase (AID), a novel member of the RNA-editing deaminase family in germinal center B cells. *J Biol Chem* 274: 18470–18476.
- Crouch EE, Li Z, Takizawa M, Fichtner-Feigl S, Gourzi P, et al. (2007) Regulation of AID expression in the immune response. *J Exp Med* 204: 1145–1156.
- Qin H, Suzuki K, Nakata M, Chikuma S, Izumi N, et al. (2011) Activation-Induced Cytidine Deaminase Expression in CD4 T Cells is Associated with a Unique IL-10-Producing Subset that Increases with Age. *PLoS One* 6: e29141.

18. Matsumoto Y, Marusawa H, Kinoshita K, Endo Y, Kou T, et al. (2007) *Helicobacter pylori* infection triggers aberrant expression of activation-induced cytidine deaminase in gastric epithelium. *Nat Med* 13: 470–476.
19. Epeldegui M, Hung YP, McQuay A, Ambinder RF, Martinez-Maza O (2007) Infection of human B cells with Epstein-Barr virus results in the expression of somatic hypermutation-inducing molecules and in the accrual of oncogene mutations. *Mol Immunol* 44: 934–942.
20. Fan J, Ma G, Nosaka K, Tanabe J, Satou Y, et al. (2010) APOBEC3G generates nonsense mutations in human T-cell leukemia virus type 1 proviral genomes in vivo. *J Virol* 84: 7278–7287.
21. Machida K, Cheng KT, Sung VM, Shimodaira S, Lindsay KL, et al. (2004) Hepatitis C virus induces a mutator phenotype: enhanced mutations of immunoglobulin and protooncogenes. *Proc Natl Acad Sci U S A* 101: 4262–4267.
22. Ishikawa C, Nakachi S, Senba M, Sugai M, Mori N (2011) Activation of AID by human T-cell leukemia virus Tax oncoprotein and the possible role of its constitutive expression in ATL genesis. *Carcinogenesis* 32: 110–119.
23. Mao C, Jiang L, Melo-Jorge M, Puthenveetil M, Zhang X, et al. (2004) T cell-independent somatic hypermutation in murine B cells with an immature phenotype. *Immunity* 20: 133–144.
24. Ueda Y, Liao D, Yang K, Patel A, Kelsoe G (2007) T-independent activation-induced cytidine deaminase expression, class-switch recombination, and antibody production by immature/transitional 1 B cells. *J Immunol* 178: 3593–3601.
25. Kuraoka M, Holl TM, Liao D, Womble M, Cain DW, et al. (2011) Activation-induced cytidine deaminase mediates central tolerance in B cells. *Proc Natl Acad Sci USA* 108: 11560–11565.
26. Meyers G, Ng YS, Bannock JM, Lavoie A, Walter JE, et al. (2011) Activation-induced cytidine deaminase (AID) is required for B-cell tolerance in humans. *Proc Natl Acad Sci U S A* 108: 11554–11559.
27. Yadav A, Oлару A, Saltis M, Setren A, Cerny J, et al. (2006) Identification of a ubiquitously active promoter of the murine activation-induced cytidine deaminase (AICDA) gene. *Mol Immunol* 43: 529–541.
28. Tran TH, Nakata M, Suzuki K, Begum NA, Shinkura R, et al. (2010) B cell-specific and stimulation-responsive enhancers derepress *Aicda* by overcoming the effects of silencers. *Nat Immunol* 11: 148–154.
29. Park SR, Zan H, Pal Z, Zhang J, Al-Qahtani A, et al. (2009) HoxC4 binds to the promoter of the cytidine deaminase AID gene to induce AID expression, class-switch DNA recombination and somatic hypermutation. *Nat Immunol* 10: 540–550.
30. Park SR, Kim PH, Lee KS, Lee SH, Seo GY, et al. (2012) APRIL stimulates NF-kappaB-mediated HoxC4 induction for AID expression in mouse B cells. *Cytokine*.
31. Sayegh CE, Quong MW, Agata Y, Murre C (2003) E-proteins directly regulate expression of activation-induced deaminase in mature B cells. *Nat Immunol* 4: 586–593.
32. Kwon K, Hutter C, Sun Q, Bilic I, Cobaleda C, et al. (2008) Instructive role of the transcription factor E2A in early B lymphopoiesis and germinal center B cell development. *Immunity* 28: 751–762.
33. Luche H, Weber O, Nageswara Rao T, Blum C, Fehling HJ (2007) Faithful activation of an extra-bright red fluorescent protein in “knock-in” Cre-reporter mice ideally suited for lineage tracing studies. *Eur J Immunol* 37: 43–53.
34. Lalmanach-Girard AC, Chiles TC, Parker DC, Rothstein TL (1993) T cell-dependent induction of NF-kappa B in B cells. *J Exp Med* 177: 1215–1219.
35. Takeda K, Kishimoto T, Akira S (1997) STAT6: its role in interleukin 4-mediated biological functions. *J Mol Med* 75: 317–326.
36. Heldin CH, Miyazono K, ten Dijke P (1997) TGF-beta signalling from cell membrane to nucleus through SMAD proteins. *Nature* 390: 465–471.
37. Fagarasan S, Muramatsu M, Suzuki K, Nagaoka H, Hiai H, et al. (2002) Critical roles of activation-induced cytidine deaminase in the homeostasis of gut flora. *Science* 298: 1424–1427.
38. Jacob J, Kassir R, Kelsoe G (1991) In situ studies of the primary immune response to (4-hydroxy-3-nitrophenyl)acetyl. I. The architecture and dynamics of responding cell populations. *J Exp Med* 173: 1165–1175.
39. Takahashi Y, Ohta H, Takemori T (2001) Fas is required for clonal selection in germinal centers and the subsequent establishment of the memory B cell repertoire. *Immunity* 14: 181–192.
40. Nagaoka H, Tran TH, Kobayashi M, Aida M, Honjo T (2010) Preventing AID, a physiological mutator, from deleterious activation: regulation of the genomic instability that is associated with antibody diversity. *Int Immunol* 22: 227–235.
41. Gonda H, Sugai M, Nambu Y, Kataaki T, Agata Y, et al. (2003) The balance between Pax5 and Id2 activities is the key to AID gene expression. *J Exp Med* 198: 1427–1437.
42. Frolov MV, Dyson NJ (2004) Molecular mechanisms of E2F-dependent activation and pRB-mediated repression. *J Cell Sci* 117: 2173–2181.
43. Matsusaka T, Fujikawa K, Nishio Y, Mukaida N, Matsushima K, et al. (1993) Transcription factors NF-IL6 and NF-kappa B synergistically activate transcription of the inflammatory cytokines, interleukin 6 and interleukin 8. *Proc Natl Acad Sci U S A* 90: 10193–10197.
44. LeClair KP, Blonar MA, Sharp PA (1992) The p50 subunit of NF-kappa B associates with the NF-IL6 transcription factor. *Proc Natl Acad Sci U S A* 89: 8145–8149.
45. Chen J, Zhao M, Rao R, Inoue H, Hao CM (2005) C/EBP{beta} and its binding element are required for NF{kappa}B-induced COX2 expression following hypertonic stress. *J Biol Chem* 280: 16354–16359.
46. Takeuchi O, Akira S (2010) Pattern recognition receptors and inflammation. *Cell* 140: 805–820.
47. Ramji DP, Foka P (2002) CCAAT/enhancer-binding proteins: structure, function and regulation. *Biochem J* 365: 561–575.
48. Poli V (1998) The role of C/EBP isoforms in the control of inflammatory and native immunity functions. *J Biol Chem* 273: 29279–29282.
